# Supplementary material
Source: PubMed Central journal article supplement (PMC3387325)

PCA Mapping (61.6%)

| Embryonic Age |       |
|---------------|-------|
| ●             | E12.5 |
| ●             | E13.5 |
| ●             | E15.5 |
| ●             | E18.5 |

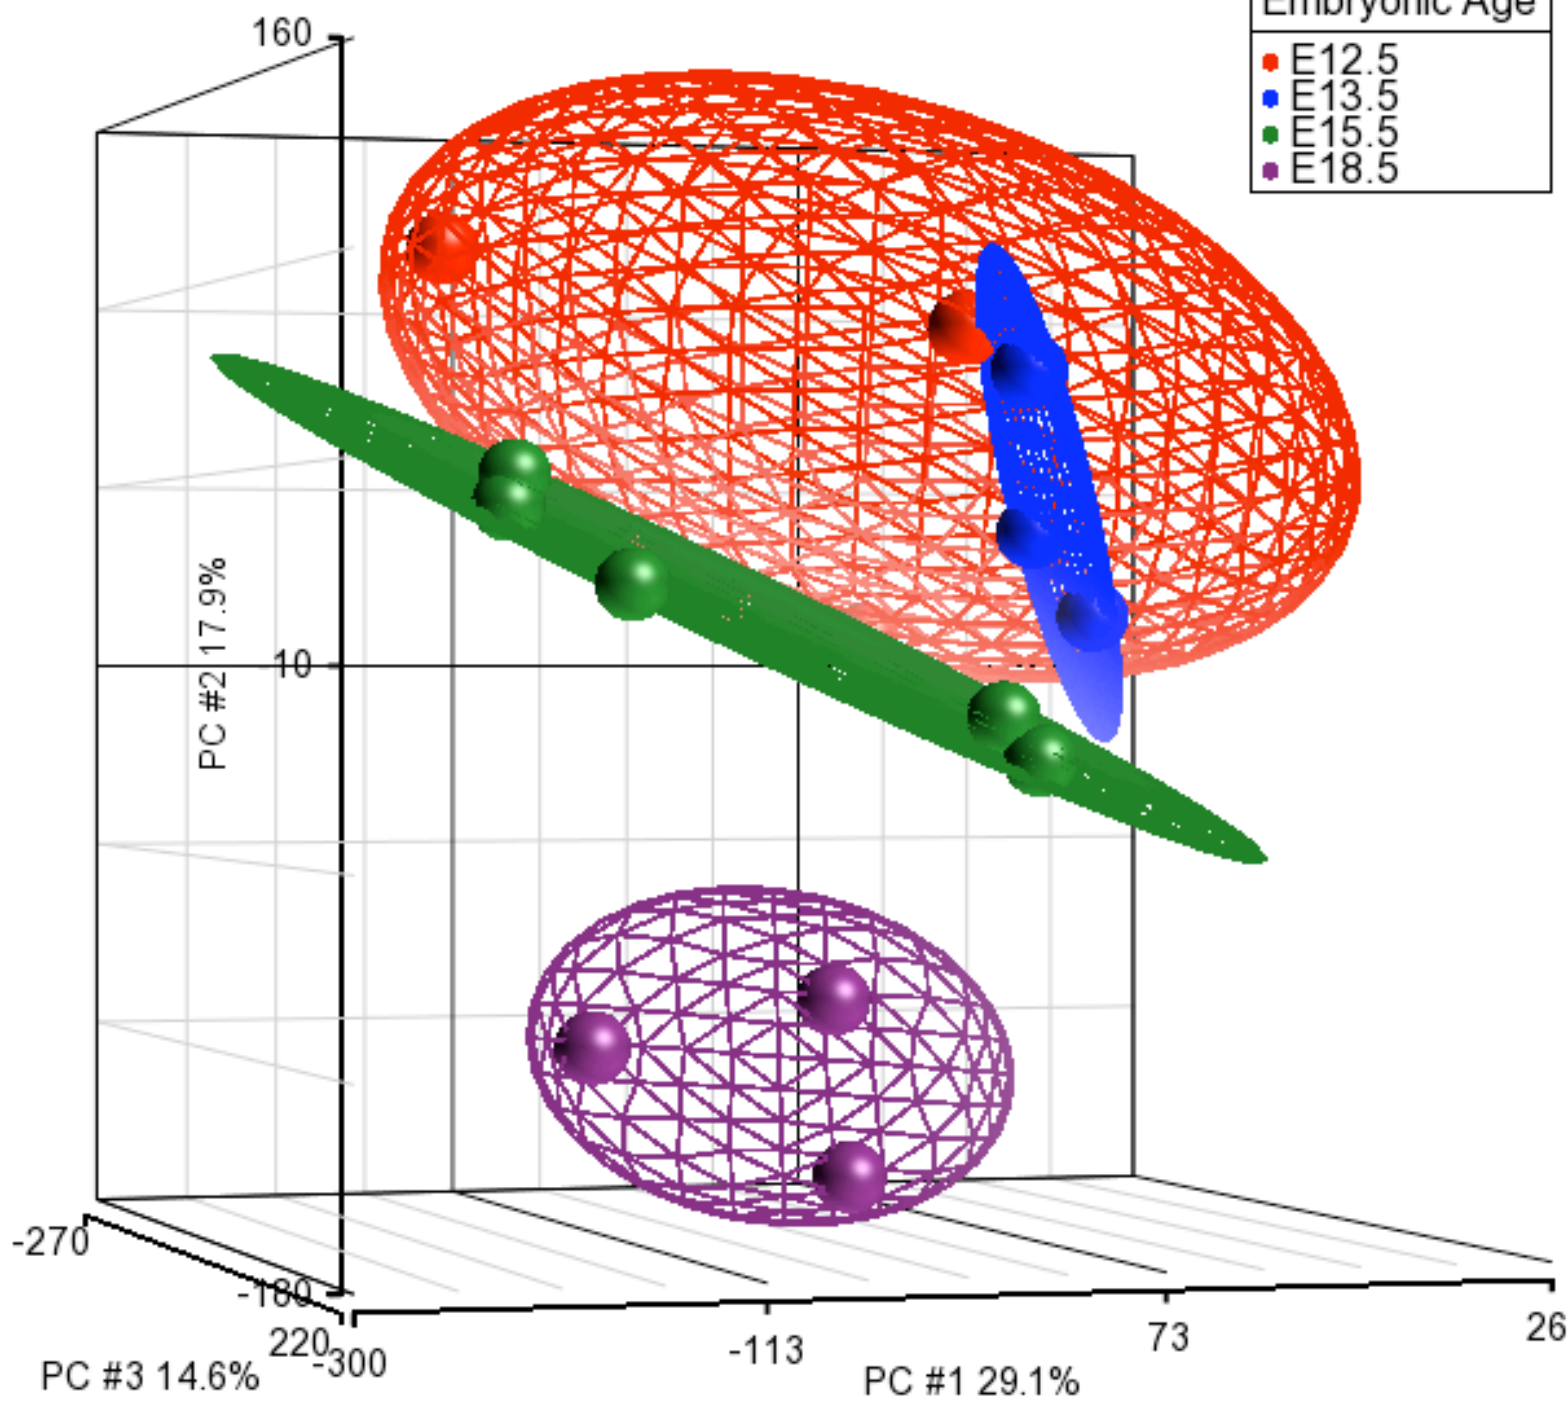

Supplement: NIHMS341321-supplement-2.pdf [file NIHMS341321-supplement-2.pdf]
